# Supplementary material
Source: MDPI journal article supplement (https://www.mdpi.com/2073-4441/8/2/56)
Supplement: s1 [file s1]

**Survey on stormwater best management practices**  
(English version)

Target group: citizens

This survey takes around 10 minutes to complete.

Thank you for participating in this survey for a study on people’s perception on stormwater best management practices. All of your answers are anonymous and the information collected will only be used for academic purposes. Your participation is very important and could help better choose and develop solutions for you and your community.

If you do not wish to answer any given question, please write “R” in the space provided for the answer.

1<sup>st</sup> Part: Background information

Please complete the following questions with the necessary information, or select the option that best suits your case.

Sex: \_\_\_\_\_Male \_\_\_\_\_Female

Age: \_\_\_\_\_

1.1 For how long have you lived in your current neighbourhood? (One answer only)

- \_\_\_\_\_ Less than a year
- \_\_\_\_\_ Between 1 and 5 years
- \_\_\_\_\_ Between 5 and 10 years
- \_\_\_\_\_ More than 10 years

1.2 Are you a member of a community group in your neighbourhood (for example, neighbourhood watch)? \_\_\_\_\_ Yes \_\_\_\_\_ No

If so, of which one(s)? \_\_\_\_\_

1.3 Highest level of school completed:

- \_\_\_\_\_ Secondary School
- \_\_\_\_\_ CEGEP or equivalent
- \_\_\_\_\_ Bachelor's Degree
- \_\_\_\_\_ Postgraduate Studies

2<sup>nd</sup> Part: Stormwater best management practices

Best management practices aim to solve problems associated with stormwater conveyance, such as flooding and deterioration of water bodies. Please complete the following table by specifying the level of importance (on a scale from 0 to 5) that you would give to the different aspects of these management practices. Even though it is possible to answer “I don’t know”, you are strongly encouraged to answer for all aspects.

- 0: I don't know
- 1: Almost no importance
- 2: Very little importance
- 3: Important
- 4: Very important
- 5: Priority

|                                                                                       | 0 | 1 | 2 | 3 | 4 | 5 |
|---------------------------------------------------------------------------------------|---|---|---|---|---|---|
| 1. The control of the amount of water entering the stormwater network.                |   |   |   |   |   |   |
| 1.1 The volume of water retained during a storm.                                      |   |   |   |   |   |   |
| 1.2 The flow of water entering the network during a storm.                            |   |   |   |   |   |   |
| 1.3 Delaying the maximum flow entering the network.                                   |   |   |   |   |   |   |
| 2. The economic cost of the management practices to use.                              |   |   |   |   |   |   |
| 3. The control of the quality of the water leaving the network.                       |   |   |   |   |   |   |
| 3.1 The removal of nitrogen (as found in some fertilizers).                           |   |   |   |   |   |   |
| 3.2 The removal of phosphorous (as found in some fertilizers).                        |   |   |   |   |   |   |
| 3.3 The removal of suspended matter (like small solid debris)                         |   |   |   |   |   |   |
| 4. People’s perception towards the implementation of these practices.                 |   |   |   |   |   |   |
| 4.1 Landscape or aesthetic benefits provided by the management practices implemented. |   |   |   |   |   |   |
| 4.2 The contribution to the sustainable development of the community.                 |   |   |   |   |   |   |
| 4.3 The contribution to the quality of life of the people in the community.           |   |   |   |   |   |   |
| 4.4 The acceptability of the community towards the management practices used.         |   |   |   |   |   |   |

Here are some examples of said practices followed by a brief description of the way they work. Using the information provided and your own personal perception/knowledge, please fill out the following table specifying your views on the different statements.

1. Green roofs: Green roofs are green spaces installed on roofs, allowing plant growth on the surface. They are composed of a drainage system, a geotextile to keep the soil in place, and a layer on the surface for plant growth.
2. Rain gardens: A rain garden is a shallow area containing vegetation, located slightly below its surroundings towards which water flows during a storm. The water can infiltrate to the soil or be collected to be sent to the main network.
3. Stormwater capture: A barrel can collect water falling on rooftops and other areas and store it for future use (like watering lawns)
4. Permeable pavement: Normally used in low-traffic areas (like driveways or parking lots). The water passes through the pavement to be later infiltrated or collected and sent to the network.

The following images show these 4 management practices.

1)

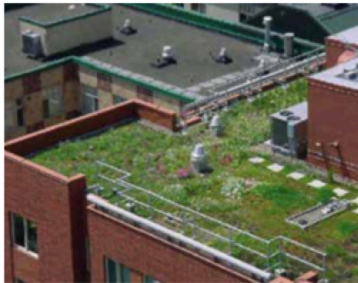

2)

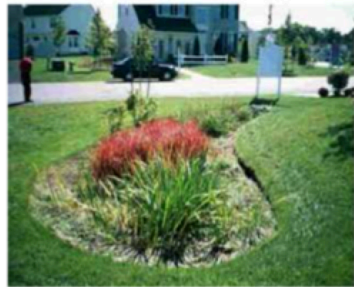

3)

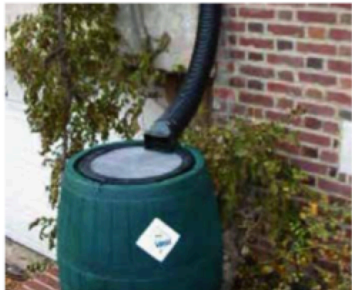

4)

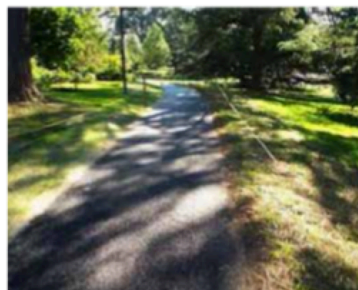

|              |            |             |            |          |               |
|--------------|------------|-------------|------------|----------|---------------|
| I don't know | Not at all | Very little | Moderately | Strongly | Very Strongly |
|--------------|------------|-------------|------------|----------|---------------|

Green roofs...

|                                                                 |  |  |  |  |  |  |
|-----------------------------------------------------------------|--|--|--|--|--|--|
| Provide aesthetic and landscape benefits                        |  |  |  |  |  |  |
| Are important for the sustainable development of the community  |  |  |  |  |  |  |
| Would be accepted by the community during their implementation. |  |  |  |  |  |  |
| Contribute to the improvement of people's quality of life.      |  |  |  |  |  |  |

Rain gardens...

|                                                                 |  |  |  |  |  |  |
|-----------------------------------------------------------------|--|--|--|--|--|--|
| Provide aesthetic and landscape benefits                        |  |  |  |  |  |  |
| Are important for the sustainable development of the community  |  |  |  |  |  |  |
| Would be accepted by the community during their implementation. |  |  |  |  |  |  |
| Contribute to the improvement of people's quality of life.      |  |  |  |  |  |  |

Stormwater capture systems...

|                                                                 |  |  |  |  |  |  |
|-----------------------------------------------------------------|--|--|--|--|--|--|
| Provide aesthetic and landscape benefits                        |  |  |  |  |  |  |
| Are important for the sustainable development of the community  |  |  |  |  |  |  |
| Would be accepted by the community during their implementation. |  |  |  |  |  |  |
| Contribute to the improvement of people's quality of life.      |  |  |  |  |  |  |

Permeable pavement...

|                                                               |  |  |  |  |  |  |
|---------------------------------------------------------------|--|--|--|--|--|--|
| Provides aesthetic and landscape benefits                     |  |  |  |  |  |  |
| Is important for the sustainable development of the community |  |  |  |  |  |  |
| Would be accepted by the community during its implementation. |  |  |  |  |  |  |
| Contributes to the improvement of people's quality of life.   |  |  |  |  |  |  |

**Survey on stormwater best management practices**  
(English version)

Target group: municipal development managers

This survey takes around 10 minutes to complete.

Thank you for participating in this survey for a study on people's perception on stormwater best management practices. All of your answers are anonymous and the information collected will only be used for academic purposes.

If you do not wish to answer any given question, please write "R" in the space provided for the answer.

1<sup>st</sup> Part: Background information

Please complete the following questions with the necessary information, or select the option that best suits your case.

Sex: \_\_\_\_\_ Female \_\_\_\_\_ Male

Age: \_\_\_\_\_ Municipality or borough where you work: \_\_\_\_\_

1.1 For how long have you work in the area of land use planning and development?  
(One answer only)

- \_\_\_\_\_ Less than a year
- \_\_\_\_\_ Between 1 and 5 years
- \_\_\_\_\_ Between 5 and 10 years
- \_\_\_\_\_ More than 10 years

1.2 What is your academic background? (Multiple answers possible)

- \_\_\_\_\_ Engineering
- \_\_\_\_\_ Planning and development (architecture, urbanism, etc.)
- \_\_\_\_\_ Basic Sciences
- \_\_\_\_\_ Management and commerce
- \_\_\_\_\_ Another (please, specify): \_\_\_\_\_

1.3 Highest level of school completed:

- \_\_\_\_\_ Bachelor's degree
- \_\_\_\_\_ DESS or equivalent
- \_\_\_\_\_ Master's degree
- \_\_\_\_\_ Doctorate

1.4 Have you ever worked (or studied) in a different country in the area of planning and development? \_\_\_\_\_ Yes \_\_\_\_\_ No

2<sup>nd</sup> Part: Stormwater best management practices

Best management practices aim to solve problems associated with stormwater conveyance, such as flooding and deterioration of water bodies. Please complete the following table by specifying the level of importance (on a scale from 0 to 5) that you would give to the different aspects of these management practices.

- 1: Almost no importance
- 2: Very little importance
- 3: Important
- 4: Very important
- 5: Priority

|                                                                                       | 1 | 2 | 3 | 4 | 5 |
|---------------------------------------------------------------------------------------|---|---|---|---|---|
| 1. The control of the amount of water entering the stormwater network.                |   |   |   |   |   |
| 1.1 The volume of water retained during a storm.                                      |   |   |   |   |   |
| 1.2 The flow of water entering the network during a storm.                            |   |   |   |   |   |
| 1.3 Delaying the maximum flow entering the network.                                   |   |   |   |   |   |
| 2. The economic cost of the management practices to use.                              |   |   |   |   |   |
| 3. The control of the quality of the water leaving the network.                       |   |   |   |   |   |
| 3.1 The removal of nitrogen (as found in some fertilizers).                           |   |   |   |   |   |
| 3.2 The removal of phosphorous (as found in some fertilizers).                        |   |   |   |   |   |
| 3.3 The removal of suspended matter (like small solid debris)                         |   |   |   |   |   |
| 4. People's perception towards the implementation of these practices.                 |   |   |   |   |   |
| 4.1 Landscape or aesthetic benefits provided by the management practices implemented. |   |   |   |   |   |
| 4.2 The contribution to the sustainable development of the community.                 |   |   |   |   |   |
| 4.3 The contribution to the quality of life of the people in the community.           |   |   |   |   |   |
| 4.4 The acceptability of the community towards the management practices used.         |   |   |   |   |   |

**Survey on stormwater best management practices**  
(English version)

Target group: engineers

This survey takes around 10 minutes to complete.

Thank you for participating in this survey for a study on people's perception on stormwater best management practices. All of your answers are anonymous and the information collected will only be used for academic purposes.

If you do not wish to answer any given question, please write "R" in the space provided for the answer.

**1<sup>st</sup> Part: Background information**

Please complete the following questions with the necessary information, or select the option that best suits your case.

Sex: \_\_\_\_\_ Female \_\_\_\_\_ Male

Age: \_\_\_\_\_ Municipality or borough where you work: \_\_\_\_\_

1.5 For how long have you work in the area of water resources? (One answer only)

- \_\_\_\_\_ Less than a year
- \_\_\_\_\_ Between 1 and 5 years
- \_\_\_\_\_ Between 5 and 10 years
- \_\_\_\_\_ More than 10 years

1.6 What is your academic background in engineering (industrial, civil, chemical, etc.)?  
(Multiple answers possible)

\_\_\_\_\_

1.7 Highest level of school completed:

- \_\_\_\_\_ Bachelor's degree
- \_\_\_\_\_ DESS or equivalent
- \_\_\_\_\_ Master's degree
- \_\_\_\_\_ Doctorate

1.8 Have you ever worked (or studied) in a different country in the area of water resources? \_\_\_\_\_ Yes \_\_\_\_\_ No

**2<sup>nd</sup> Part: Stormwater best management practices**

Best management practices aim to solve problems associated with stormwater conveyance, such as flooding and deterioration of water bodies. Please complete the following table by specifying the level of importance (on a scale from 0 to 5) that you would give to the different aspects of these management practices.

- 1: Almost no importance
- 2: Very little importance
- 3: Important
- 4: Very important
- 5: Priority

|                                                                                       | 1 | 2 | 3 | 4 | 5 |
|---------------------------------------------------------------------------------------|---|---|---|---|---|
| 1. The control of the amount of water entering the stormwater network.                |   |   |   |   |   |
| 1.1 The volume of water retained during a storm.                                      |   |   |   |   |   |
| 1.2 The flow of water entering the network during a storm.                            |   |   |   |   |   |
| 1.3 Delaying the maximum flow entering the network.                                   |   |   |   |   |   |
| 2. The economic cost of the management practices to use.                              |   |   |   |   |   |
| 3. The control of the quality of the water leaving the network.                       |   |   |   |   |   |
| 3.1 The removal of nitrogen (as found in some fertilizers).                           |   |   |   |   |   |
| 3.2 The removal of phosphorous (as found in some fertilizers).                        |   |   |   |   |   |
| 3.3 The removal of suspended matter (like small solid debris)                         |   |   |   |   |   |
| 4. People's perception towards the implementation of these practices.                 |   |   |   |   |   |
| 4.1 Landscape or aesthetic benefits provided by the management practices implemented. |   |   |   |   |   |
| 4.2 The contribution to the sustainable development of the community.                 |   |   |   |   |   |
| 4.3 The contribution to the quality of life of the people in the community.           |   |   |   |   |   |
| 4.4 The acceptability of the community towards the management practices used.         |   |   |   |   |   |
